# Supplementary material for: Quantifying the medical student learning curve for ECG rhythm strip interpretation using deliberate practice
Source: PubMed Central journal article supplement (PMC6737266; doi:10.3205/zma001248), 2019-08-15
Supplement: JME-36-4-40-s-001.pdf [file JME-36-4-40-s-001.pdf]

| Statistical test | ANCOVA*                      | paired t test, Bonferroni corrected | ANCOVA*                       | paired t test, Bonferroni corrected |
|------------------|------------------------------|-------------------------------------|-------------------------------|-------------------------------------|
| Comparitors      | School 1 vs. School 2        | Compared to prior module            | School 1 vs. School 2         | Compared to prior module            |
| Metric           | Diagnostic accuracy          | Diagnostic accuracy                 | Time per module               | Time per module                     |
|                  |                              |                                     |                               |                                     |
| Module 1         | $t(299) = XX, p = 0.63$      | No prior module                     | $t(299) = XX, p = 0.19$       | No prior module                     |
| Module 2         | $F(1, 278) = 1.68, p = 0.20$ | $t(284) = -8.03, p < 0.001$         | $F(1, 278) = 0.44, p = 0.51$  | $t(284) = 10.16, p < 0.001$         |
| Module 3         | $F(1, 241) = 2.40, p = 0.12$ | $t(246) = -6.84, p < 0.001$         | $F(1, 241) = 5.19, p = 0.024$ | $t(246) = 7.82, p < 0.001$          |
| Module 4         | $F(1, 169) = 0.00, p = 0.97$ | $t(174) = -2.21, p = 0.07$          | $F(1, 169) = .044, p = 0.83$  | $t(174) = 3.95, p = 0.007$          |
| Module 5         | $F(1, 112) = 3.13, p < 1.64$ | $t(117) = -2.65, p = 0.02$          | $F(1, 112) = 2.87, p = 0.09$  | $t(117) = 4.39, p < 0.001$          |
| Module 6         | n/a                          | n/a                                 | $F(1, 77) = 0.52, p = 0.47$   | $t(81) = 3.25, p = 0.006$           |
| Module 7         | n/a                          | n/a                                 | $F(1, 50) = 3.55, p = 0.07$   | $t(54) = 3.16, p = 0.009$           |
| Module 8         | n/a                          | n/a                                 | $F(1, 33) = 0.01, p = 0.91$   | $t(37) = 4.33, p < 0.001$           |

\*School 1 vs. School 2 comparisons in Module 1 were assessed by t-test because no comparison to prior module was possible.

n/a = not assessed. Decision to not assess was made *a priori* based on visual inspection of the Gompertz and Michaelis-Mentin curves.
