# Supplementary material for: Quantifying the medical student learning curve for ECG rhythm strip interpretation using deliberate practice
Source: PubMed Central journal article supplement (PMC6737266; doi:10.3205/zma001248), 2019-08-15
Supplement: JME-36-4-40-s-002.pdf [file JME-36-4-40-s-002.pdf]

## PRE-SURVEY COMPLETED BY 298 STUDENTS

### [RESPONSES IN BRACKETS]

1. What is your gender?
  - a. Male [46%]
  - b. Female [54%]
2. What is your age? (type number only please) [24.9 (4.2) years]
3. How much time practicing ECG interpretation have you done previously?
  - a. None [43%]
  - b. 1-30 minutes [19%]
  - c. 31-60 minutes [14%]
  - d. 60-120 minutes [13%]
  - e. >120 minutes [11%]
4. How confident are you at reading ECG's?
  - a. Not at all (I would be completely guessing) [20%]
  - b. Very low (I might get 1 right) [28%]
  - c. Low (I might get a couple right) [37%]
  - d. High (I should get most right) [13%]
  - e. Very high (I expect to get nearly all right) [2%]
5. Have you studied using online practice modules before for medical skills?
  - a. Never [60%]
  - b. Yes, but not for ECG [35%]
  - c. Yes, and it was for ECG [5%]
6. Do you think practicing is required for learn ECG interpretation?
  - a. Not required [0%]
  - b. Probably not needed [0%]
  - c. I don't know [1%]
  - d. Probably important [11%]
  - e. Absolutely required [88%]

7. Do you expect online practice modules for ECG will be EFFICIENT (good learning for your time spent)?
- a. Not at all [0%]
  - b. Probably not [0%]
  - c. Not sure [7%]
  - d. Probably yes [38%]
  - e. For sure yes [55%]
8. Do you expect online practice modules for ECG will be EFFECTIVE (they will actually work for you)?
- a. Not at all [0%]
  - b. Probably not [1%]
  - c. I don't know [6%]
  - d. Probably effective [62%]
  - e. Extremely effective [31%]
9. If you have any comments, please type below:

**POST SURVEY COMPLETED BY 174 STUDENTS**

1. How confident are you at reading ECG's?
- a. Not at all (I would be completely guessing) [0%]
  - b. Very low (I might get 1 right) [1%]
  - c. Low (I might get a couple right) [13%]
  - d. High (I should get most right) [75%]
  - e. Very high (I expect to get nearly all right) [11%]
2. Do you think practicing is required for learn ECG interpretation?
- a. Not required [0%]
  - b. Probably not needed [0%]
  - c. I don't know [1%]
  - d. Probably important [4%]
  - e. Absolutely required [95%]

3. Do you think online practice modules for ECG is EFFICIENT (good learning for your time spent)?
- a. Not at all [0.5%]
  - b. Probably not [0.5%]
  - c. Not sure [1%]
  - d. Probably yes [24%]
  - e. For sure yes [74%]
4. Do you expect online practice modules for ECG will be EFFECTIVE (they will actually work for you)?
- a. Not at all [1%]
  - b. Probably not [0%]
  - c. I don't know [3%]
  - d. Probably effective [37%]
  - e. Extremely effective [60%]
5. How important was the instant feedback to you?
- a. Not at all. It did not help [0%]
  - b. Not bad. Was occasionally useful [2%]
  - c. I don't know [2%]
  - d. Good. It helped a fair bit. [31%]
  - e. Excellent. Is absolutely required. [65%]
6. Did you have fun working on the practice modules?
- a. Not at all. They were painful [1%]
  - b. Not really, but they were not painful [4%]
  - c. I don't know [3%]
  - d. They were a little enjoyable [48%]
  - e. They were very fun [44%]

7. Would you want this format of practice for other skills (x-rays or ultrasound for example)?

- a. Not at all [1%]
- b. Not really [1%]
- c. I don't know [0%]
- d. Probably yes [22%]
- e. For sure yes [76%]

8. If you have any comments, please type below:
